# Supplementary material for: Prognostic value of preoperative lymphocyte-monocyte ratio in patients with ovarian clear cell carcinoma
Source: PubMed Central journal article supplement — J Cancer. 2018 Mar 8;9(7):1127–34. doi: 10.7150/jca.24057 (PMC5907660; doi:10.7150/jca.24057), 2018-03-08
Supplement: jcav09p1127s1.pdf [file jcav09p1127s1.pdf]

**Table S1. Absolute count of neutrophil, lymphocyte or monocyte in patients with ovarian clear cell carcinoma with or without endometriosis**

| Characteristics | Endometriosis – | Endometriosis + | <i>P</i> |
|-----------------|-----------------|-----------------|----------|
|                 | (n = 85)        | (n = 24)        |          |
|                 | Mean ± SD       | Mean ± SD       |          |
| ANC (per µL)    | 3490.5 ± 2606.6 | 4238.1 ± 2556.8 | 0.260    |
| ALC (per µL)    | 1497.1 ± 656.2  | 1628.1 ± 558.1  | 0.446    |
| AMC (per µL)    | 397.7 ± 209.3   | 499.8 ± 290.8   | 0.102    |

ANC, absolute neutrophil count; ALC, absolute lymphocyte count; AMC, absolute monocyte count.
